# Supplementary material for: Evolution of Subclinical Hypothyroidism Diagnosed in the First 3 Months of Life in Newborns Living in North Italy: A Retrospective Cohort Study
Source: MDPI journal article supplement (doi:10.3390/children10010118), 2023-01-06
Supplement: s1 [file s1]

**Supplementary Table 1.** *Thyroid function of treated (Group 1) and untreated (Group 2) patients during the follow up*

|           | TSH (mIU/ml) |           | fT3 (pg/ml) |           | fT4 (ng/dl) |           |
|-----------|--------------|-----------|-------------|-----------|-------------|-----------|
|           | Group 1      | Group 2   | Group 1     | Group 2   | Group 1     | Group 2   |
| <b>T0</b> | 15.74±2.09   | 7.02±5.05 | 4.92±0.35   | 4.90±0.36 | 1.44±0.19   | 1.42±0.22 |
| <b>T1</b> | 5.33±3.06    | 5.19±1.50 | 4.80±0.26   | 4.76±0.25 | 1.53± 0.24  | 1.46±0.29 |
| <b>T2</b> | 5.34±1.72    | 5.10±1.15 | 4.68±0.28   | 4.53±0.30 | 1.49±0.29   | 1.44±0.35 |
| <b>T3</b> | 3.46±1.05    | 4.20±0.87 | 4.26±0.43   | 4.24±0.40 | 1.56±0.53   | 1.52±0.52 |
| <b>T4</b> | 3.09±0.79    | 4.10±0.76 | 4.30±0.25   | 4.30±0.23 | 1.63±0.56   | 1.58±0.59 |
| <b>T5</b> | 3.09±0.87    | 3.87±0.70 | 4.28±0.39   | 4.27±0.35 | 1.41±0.12   | 1.36±0.15 |
| <b>T6</b> | 2.54±0.92    | 4.15±0.76 | 4.34±0.30   | 4.24±0.36 | 1.38±0.11   | 1.35±0.14 |
| <b>T7</b> | 2.59±0.68    | 3.15±1.07 | 4.20±0.24   | 4.18±0.27 | 1.39±0.11   | 1.39±0.11 |
| <b>T8</b> | 2.69±1.05    | 4.16±0.68 | 4.28±0.27   | 4.29±0.25 | 1.42±0.15   | 1.40±0.16 |

Thyroid function assessed at the time of the first medical examination (T0) and every six months until four years of age (T1-T8).

All data are expressed as mean ± sem (Standard Error of the Mean).

Abbreviations: fT3, free tri-iodothyronine; fT4, free thyroxine; TSH, thyroid stimulating hormone.
